# Supplementary material for: Laser-Induced Interdigital Structured Graphene Electrodes Based Flexible Micro-Supercapacitor for Efficient Peak Energy Storage
Source: MDPI journal article supplement (doi:10.3390/molecules27010329), 2022-01-05
Supplement: s1 [file s1]

## Supplementary Materials

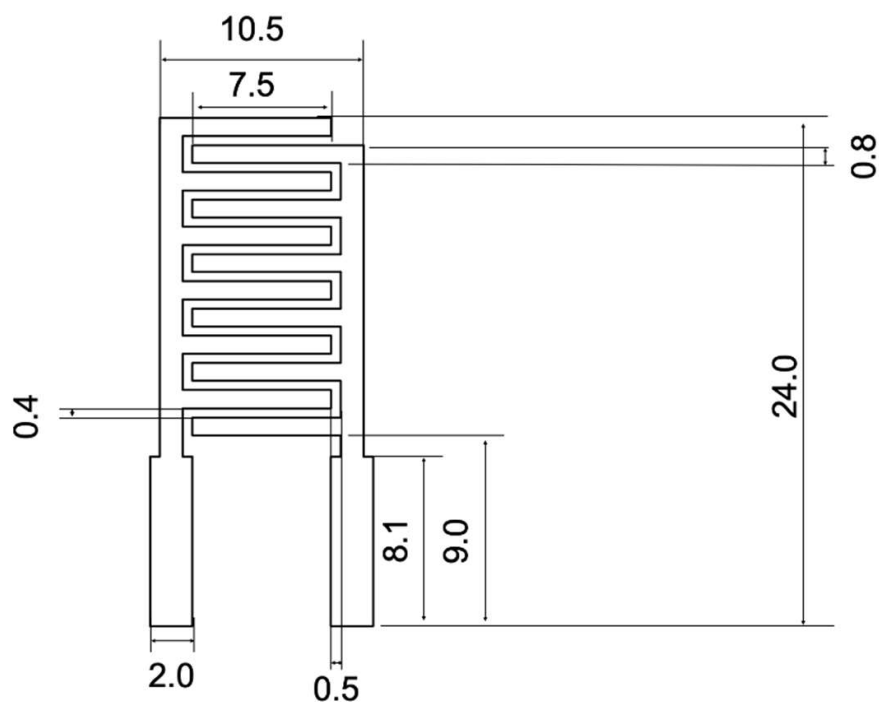

**Figure S1.** Details of the technical drawing of the template of the applied IMSC cell geometry (unit in mm).

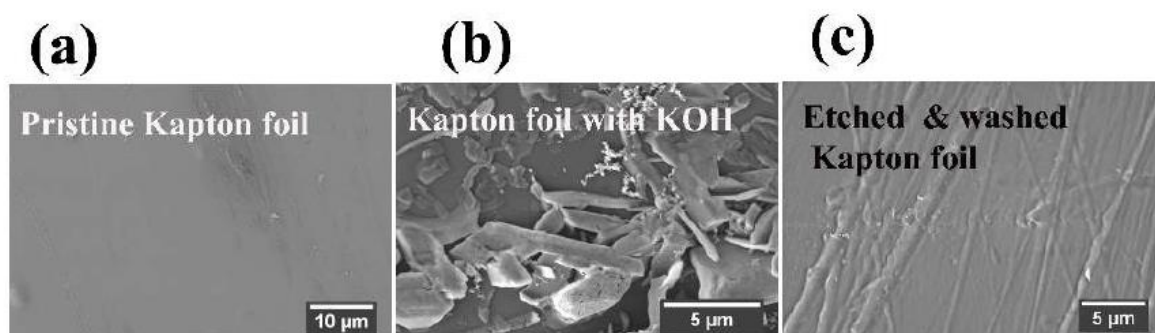

## Etching process

**Figure S2.** SEM images of the surface changing due to the KOH etching process of PI-foil: (a) pristine PI foil, (b) PI foil with dried KOH and (c) after etching and washing process of PI-foil.

**Table S1:** Some values calculated from GCD curves of this LIG-MSC device.

| Current Density<br>(mA/cm <sup>2</sup> ) | Discharge time (s) | Using Eq. (2-4)                                           |                                                               |                                                              | Using Eq. (6-8)                          |                                               |                                            |
|------------------------------------------|--------------------|-----------------------------------------------------------|---------------------------------------------------------------|--------------------------------------------------------------|------------------------------------------|-----------------------------------------------|--------------------------------------------|
|                                          |                    | Areal capacitance<br>C <sub>A</sub> (mF/cm <sup>2</sup> ) | Areal Energy density<br>E <sub>A</sub> (μWh/cm <sup>2</sup> ) | Areal Energy density<br>P <sub>A</sub> (mW/cm <sup>2</sup> ) | Sp. capacitance<br>C <sub>m</sub> (mF/g) | Sp. Energy density<br>E <sub>m</sub> (mWh/kg) | Sp. Power density<br>P <sub>m</sub> (W/kg) |
| 0.03                                     | 30.75              | 0.461                                                     | 0.256                                                         | 0.029                                                        | 166.1                                    | 92.25                                         | 10.81                                      |
| 0.05                                     | 17.86              | 0.446                                                     | 0.248                                                         | 0.049                                                        | 160.7                                    | 89.28                                         | 17.99                                      |
| 0.07                                     | 12.04              | 0.421                                                     | 0.234                                                         | 0.069                                                        | 151.7                                    | 84.27                                         | 25.19                                      |
| 0.10                                     | 7.66               | 0.383                                                     | 0.212                                                         | 0.110                                                        | 137.8                                    | 76.56                                         | 35.97                                      |

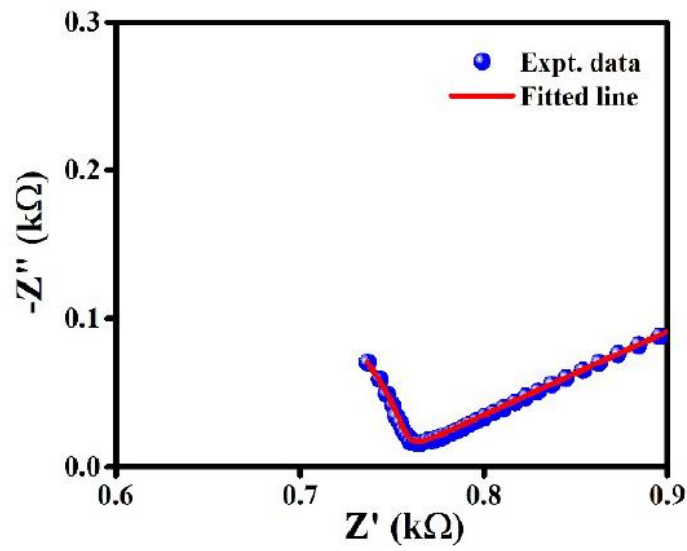

**Figure S3.** EIS image at high frequency region of this LIG-MSC device.
